# Supplementary material
Source: PubMed Central journal article supplement (PMC7664474)

# Sigh in Patients With Acute Hypoxemic Respiratory Failure and ARDS

## The PROTECTION Pilot Randomized Clinical Trial

*Tommaso Mauri, MD; Giuseppe Foti, MD; Carla Fornari, PhD; Giacomo Grasselli, MD; Riccardo Pinciroli, MD; Federica Lovisari, MD; Daniela Tubiolo, MD; Carlo Alberto Volta, MD; Savino Spadaro, MD; Roberto Rona, MD; Egle Rondelli, MD; Paolo Navalesi, MD; Eugenio Garofalo, MD; Rihard Knafelj, MD; Vojka Gorjup, MD; Riccardo Colombo, MD; Andrea Cortegiani, MD; Jian-Xin Zhou, MD; Rocco D'Andrea, MD; Italo Calamai, MD; Ánxela Vidal González, MD; Oriol Roca, MD; Domenico Luca Grieco, MD; Tomas Jovaisa, MD; Dimitrios Bampalis, MD; Tobias Becher, MD; Denise Battaglini, MD; Huiqing Ge, MD; Mariana Luz, MD; Jean-Michel Constantin, MD; Marco Ranieri, MD; Claude Guerin, MD; Jordi Mancebo, MD; Paolo Pelosi, MD; Roberto Fumagalli, MD; Laurent Brochard, MD; and Antonio Pesenti, MD*

CHEST 2021; 159(4):1426-1436

*Online supplements are not copyedited prior to posting and the author(s) take full responsibility for the accuracy of all data.*

## **e-Appendix 1.**

### **ADDITIONAL METHODS**

**Exclusion criteria.** Age younger than 18 years;  $\text{PaO}_2/\text{FiO}_2$  ratio  $\leq 100$  mmHg or PEEP  $\geq 15$  cmH<sub>2</sub>O or  $\text{PaCO}_2 > 60$  mmHg or arterial pH  $< 7.30$ ; known neuro-muscular or central nervous system disorder; history of severe chronic obstructive pulmonary disease or fibrosis; AHRF or ARDS fully explained by cardiac failure or fluid overload; evidence of active air leak from the lung; cardiovascular instability; clinical suspicion of elevated intracranial pressure; extra-corporeal life support (i.e., extra-corporeal membrane oxygenation); moribund status (i.e., patient deemed at extremely high risk of dying within hours); refusal by the attending physician.

**Rescue treatments.** In case of desaturation with  $\text{SpO}_2 \leq 90\%$ , after ruling out hemodynamic impairment, airway obstruction and ventilator malfunction, the following rescue step-up strategy was allowed: institution of protective controlled mechanical ventilation and then a recruitment maneuver; PEEP increase  $\geq 15$  cmH<sub>2</sub>O; prone positioning; inhaled nitric oxide; extra-corporeal membrane oxygenation. Patients who underwent rescue treatments were re-assessed at least every 8 hours and switched back to Sigh or No Sigh group as soon as pre-defined criteria for improvement were met.

**Standard of care.** In all patients, standard of care for intubated AHRF and ARDS patients (e.g., early appropriate etiologic therapy, restrictive fluid strategy, suctioning of secretions, prophylaxis of gastric stress ulcer and deep veins thrombosis, semi-recumbent positioning, respiratory physiotherapy, adequate nutrition, monitoring of sedation, pain and delirium, tracheostomy, non-invasive respiratory support after extubation) was granted throughout the whole ICU stay in accordance to local protocols.

**Predictors of mortality.** The following exploratory analysis was performed: multivariate regression for independent predictors of mortality and ventilator-free days including classification of being responder or non-responder to Sigh. We did a preliminary evaluation of mortality and ventilator-free days (VFDs), exploring factors that might influence the two outcomes and considering possible confounders. Cox regression models for mortality and Poisson regression models for VFDs were used. Explanatory variables evaluated were: age, sex, number of comorbidities, baseline SOFA and SAPS II scores, Sigh Responder status, diagnosis of ARDS and treatment arm (Sigh or No Sigh).

### **ADDITIONAL RESULTS**

**Multivariate analyses.** The multivariate cox-regression analysis showed that the predictors of mortality were age (HR 1.045, 95% CI 1.020-1.070,  $p < 0.001$ ) and SAPSII (HR 1.026, 95% CI 1.008-1.044,  $p = 0.005$ ). Age (Beta -0.009,  $p < 0.001$ ), SOFA (Beta -0.011,  $p = 0.020$ ), Sigh responder status (Beta 0.135,  $p < 0.001$ ) and diagnosis of ARDS (Beta -0.276,  $p < 0.001$ ), instead, predicted the number of ventilator-free days.

**e-Table 1. Sigh Responders - Baseline characteristics**

|                                         | Sigh<br>(N=73)    | No Sigh<br>(N=83) | P Value <sup>a</sup> |
|-----------------------------------------|-------------------|-------------------|----------------------|
| Demographics                            |                   |                   |                      |
| Male, No.(%)                            | 44 (60)           | 54 (65))          | 0.537                |
| Age, mean (SD),y                        | 62 (18)           | 63 (15)           | 0.613                |
| Height, median (Q1, Q3), cm             | 170 (165, 175)    | 170 (160,176)     | 0.466                |
| Weight, median (Q1, Q3), Kg             | 80 (68, 92)       | 79 (65, 88)       | 0.337                |
| BMI, median (Q1, Q3), Kg/m <sup>2</sup> | 26.1 (23.4, 29.7) | 26.2 (24.2-31.1)  | 0.524                |
| Comorbidities, No.(%)                   |                   |                   |                      |
| Chronic cardiovascular disease          | 34 (47)           | 47 (57)           | 0.210                |
| Chronic pulmonary disease               | 13 (18)           | 18 (22)           | 0.545                |
| Diabetes                                | 17 (23)           | 18 (22)           | 0.811                |
| Chronic renal disease                   | 8 (11)            | 13 (16)           | 0.390                |
| Cancer                                  | 9 (12)            | 10 (12)           | 0.957                |
| Number of comorbidities, No.(%)         |                   |                   |                      |
| 0                                       | 25 (34)           | 24(29)            | 0.725                |
| 1                                       | 26 (36)           | 27 (33)           |                      |
| 2                                       | 13 (18)           | 20 (24)           |                      |
| ≥3                                      | 9 (12)            | 12 (15)           |                      |
| Recent medical history                  |                   |                   |                      |
| In-hospital days, median (Q1, Q3)       | 5 (3, 9)          | 5 (3, 8)          | 0.368                |
| ICU days, median (Q1, Q3)               | 3 (2,5)           | 3 (2, 5)          | 0.471                |
| Intubation days, median (Q1, Q3)        | 3 (2, 5)          | 3 (2, 4)          | 0.306                |
| SAPS II, median (Q1, Q3)                | 42 (32, 55)       | 41 (31, 56)       | 0.869                |
| SOFA, median (Q1, Q3)                   | 7 (5, 10)         | 7 (5, 9)          | 0.479                |
| RASS, No. (%)                           |                   |                   |                      |
| -2                                      | 38 (52)           | 47 (56)           | 0.843                |
| -1                                      | 18 (25)           | 18 (22)           |                      |
| 0                                       | 17 (23)           | 18 (22)           |                      |

|                                                            |                |                |       |
|------------------------------------------------------------|----------------|----------------|-------|
| Diagnosis of sepsis, No. (%)                               |                |                |       |
| Sepsis                                                     | 23 (32)        | 25 (30)        | 0.352 |
| Septic Shock                                               | 10 (14)        | 19 (23)        |       |
| Non septic                                                 | 37 (51)        | 37 (45)        |       |
| Not Specified                                              | 3 (4)          | 2 (2)          |       |
| Etiology                                                   |                |                |       |
| Pneumonia, No. (%)                                         | 44 (60)        | 47 (57)        | 0.645 |
| Aspiration of gastric content, No. (%)                     | 8 (11)         | 9 (11)         | 0.982 |
| Vasculitis, No. (%)                                        | 1 (1)          | 0 (0)          | 0.468 |
| Non-pulmonary sepsis, No. (%)                              | 15 (21)        | 15 (18)        | 0.695 |
| Trauma, No. (%)                                            | 1 (1)          | 4 (5)          | 0.960 |
| Pancreatitis, No. (%)                                      | 3 (4)          | 3 (4)          | 1.000 |
| Burns, No. (%)                                             | 0(0)           | 1 (1)          | 1.000 |
| TRALI, No. (%)                                             | 3 (4)          | 3 (4)          | 1.000 |
| Others, No. (%)                                            | 11 (15)        | 12 (15)        | 0.915 |
| Pulmonary infiltrates, No. (%)                             |                |                |       |
| None                                                       | 14 (20)        | 13 (16)        | 0.726 |
| Unilateral                                                 | 23 (32)        | 24 (29)        |       |
| Bilateral (ARDS diagnosis)                                 | 36 (49)        | 46 (55)        |       |
| PEEP, median (Q1, Q3), cmH <sub>2</sub> O                  | 10 (8,10)      | 10 (8,12)      | 0.705 |
| PSV, median (Q1, Q3), cmH <sub>2</sub> O                   | 10 (8,12)      | 10 (8,12)      | 0.319 |
| RR, median (Q1, Q3), bpm                                   | 18 (14, 22)    | 18 (15, 23)    | 0.952 |
| pH, mean (SD)                                              | 7.43 (0.06)    | 7.43 (0.05)    | 0.483 |
| PaO <sub>2</sub> /FiO <sub>2</sub> , median (Q1, Q3), mmHg | 227 (192, 253) | 211 (183, 245) | 0.357 |
| PaCO <sub>2</sub> , median (Q1, Q3), mmHg                  | 44 (39, 50)    | 43 (40, 47)    | 0.714 |

Continuous data are reported as median(Q<sub>1</sub>, Q<sub>3</sub>) or mean (SD). Categorical data are report as No.(%). Abbreviations. BMI= Body Mass Index, ICU= Intensive Care Unit, SASPS=Simplified Acute Physiology Score, SOFA=Sequential Organ Failure Assessment, RASS= Richmond Agitation Sedation Score, TRALI= transfusion-related acute lung injury, PEEP= Positive end-expiratory pressure, PSV=Pressure Support Ventilation, RR= Respiratory Rate, PAO<sub>2</sub>= partial pressure of oxygen, FiO<sub>2</sub>= inspired oxygen fraction; PaCO<sub>2</sub>= Partial pressure of carbon dioxide in the arterial blood,

<sup>a</sup> Test for difference Sigh vs No Sigh.

**e-Table 2. Sigh Non-Responders - Baseline characteristics.**

|                                         | Sigh<br>(N=56)    | No Sigh<br>(N=46) | P Value <sup>a</sup> |
|-----------------------------------------|-------------------|-------------------|----------------------|
| Demographics                            |                   |                   |                      |
| Male, No.(%)                            | 43 (77)           | 38 (83)           | 0.469                |
| Age, mean (SD),y                        | 64 (15)           | 65 (14)           | 0.861                |
| Height, median (Q1, Q3), cm             | 170 (165, 178.5)  | 170 (162, 175)    | 0.499                |
| Weight, median (Q1, Q3), Kg             | 79 (66, 90)       | 80 (70, 86)       | 0.984                |
| BMI, median (Q1, Q3), Kg/m <sup>2</sup> | 26.0 (22.9, 30.1) | 26.4 (23.8-30.1)  | 0.503                |
| Comorbidities, No.(%)                   |                   |                   |                      |
| Chronic cardiovascular disease          | 32 (57)           | 32 (70)           | 0.197                |
| Chronic pulmonary disease               | 6 (11)            | 9 (20)            | 0.209                |
| Diabetes                                | 9 (16)            | 10 (22)           | 0.432                |
| Chronic renal disease                   | 6 (11)            | 11 (24)           | 0.075                |
| Cancer                                  | 4 (7)             | 8 (17)            | 0.110                |
| Number of comorbidities, No.(%)         |                   |                   |                      |
| 0                                       | 19 (34)           | 8 (18)            | 0.159                |
| 1                                       | 22 (40)           | 17 (38)           |                      |
| 2                                       | 10 (18)           | 11 (24)           |                      |
| ≥3                                      | 5 (9)             | 9 (20)            |                      |
| Recent medical history                  |                   |                   |                      |
| In-hospital days, median (Q1, Q3)       | 5 (3, 7)          | 5.5 (3, 9)        | 0.427                |
| ICU days, median (Q1, Q3)               | 3 (2, 5)          | 3 (2, 5)          | 0.881                |
| Intubation days, median (Q1, Q3)        | 3 (2, 4.5)        | 3 (2, 5)          | 0.840                |
| SAPS II, median (Q1, Q3)                | 42 (30, 53)       | 45 (33, 55)       | 0.561                |
| SOFA, median (Q1, Q3)                   | 8 (5, 10)         | 8 (5, 10)         | 0.661                |
| RASS, No. (%)                           |                   |                   |                      |
| -2                                      | 26 (46)           | 25 (54)           | 0.706                |
| -1                                      | 9 (16)            | 7 (15)            |                      |
| 0                                       | 21 (38)           | 14 (30)           |                      |

|                                                            |                |                |       |
|------------------------------------------------------------|----------------|----------------|-------|
| Diagnosis of sepsis, No. (%)                               |                |                |       |
| Sepsis                                                     | 20 (36)        | 14 (30)        | 0.147 |
| Septic Shock                                               | 19 (18)        | 16 (35)        |       |
| Non septic                                                 | 23 (41)        | 14 (30)        |       |
| Not Specified                                              | 3 (5)          | 2 (4)          |       |
| Etiology                                                   |                |                |       |
| Pneumonia, No. (%)                                         | 35 (63)        | 28 (61)        | 0.866 |
| Aspiration of gastric content, No. (%)                     | 7 (13)         | 2 (4)          | 0.137 |
| Vasculitis, No. (%)                                        | 0 (0)          | 1 (2)          | 1.000 |
| Non-pulmonary sepsis, No. (%)                              | 5 (9)          | 9 (20)         | 0.120 |
| Trauma, No. (%)                                            | 4 (7)          | 2 (4)          | 0.137 |
| Pancreatitis, No. (%)                                      | 1 (2)          | 1 (2)          | 0.799 |
| Burns, No. (%)                                             | 1 (2)          | 0 (0)          | 0.549 |
| TRALI, No. (%)                                             | 0 (0)          | 1 (2)          | 0.451 |
| Others, No. (%)                                            | 4 (7)          | 4 (9)          | 1.000 |
| Pulmonary infiltrates, No. (%)                             |                |                |       |
| None                                                       | 14 (25)        | 9 (20)         | 0.646 |
| Unilateral                                                 | 19 (34)        | 14 (30)        |       |
| Bilateral (ARDS diagnosis)                                 | 23 (41)        | 23 (50)        |       |
| PEEP, median (Q1, Q3), cmH <sub>2</sub> O                  | 9.5 (8, 12)    | 9 (8,10)       | 0.498 |
| PSV, median (Q1, Q3), cmH <sub>2</sub> O                   | 10 (8,12)      | 10 (8,12)      | 0.181 |
| RR, median (Q1, Q3), bpm                                   | 17 (14, 21)    | 19 (15, 22)    | 0.250 |
| pH, mean (SD)                                              | 7.43 (0.05)    | 7.43 (0.07)    | 0.909 |
| PaO <sub>2</sub> /FiO <sub>2</sub> , median (Q1, Q3), mmHg | 211 (190, 257) | 242 (198, 270) | 0.187 |
| PaCO <sub>2</sub> , median (Q1, Q3), mmHg                  | 45 (38, 48)    | 44 (39, 48)    | 0.853 |

Continuous data are reported as median(Q<sub>1</sub>, Q<sub>3</sub>) or mean (SD). Categorical data are report as No.(%). Abbreviations. BMI= Body Mass Index, ICU= Intensive Care Unit, SASPS=Simplified Acute Physiology Score, SOFA=Sequential Organ Failure Assessment, RASS= Richmond Agitation Sedation Score, TRALI= transfusion-related acute lung injury, PEEP= Positive end-expiratory pressure, PSV=Pressure Support Ventilation, RR= Respiratory Rate, PAO<sub>2</sub>= partial pressure of oxygen, FiO<sub>2</sub>= inspired oxygen fraction; PaCO<sub>2</sub>= Partial pressure of carbon dioxide in the arterial blood,

<sup>a</sup> Test for difference Sigh vs No Sigh.

**e-Table 3. Analysis of time trends and differences of selected physiological variables (see e-Figure 1) between study groups.– GEE models**

| Effect                                        | F Value | P Value |
|-----------------------------------------------|---------|---------|
| <i>PEEP (cmH<sub>2</sub>O)<sup>a</sup></i>    |         |         |
| Time                                          | 7.72    | <0.001  |
| Group (Sigh vs. No Sigh)                      | 0.01    | 0.943   |
| Time* Group                                   | 1.44    | 0.198   |
| <i>FiO<sub>2</sub></i>                        |         |         |
| Time                                          | 1.55    | 0.163   |
| Group (Sigh vs. No Sigh)                      | 2.64    | 0.105   |
| Time* Group                                   | 1.41    | 0.210   |
| <i>PaO<sub>2</sub>/FiO<sub>2</sub> (mmHg)</i> |         |         |
| Time                                          | 1.47    | 0.189   |
| Group (Sigh vs. No Sigh)                      | 5.35    | 0.022   |
| Time* Group                                   | 1.75    | 0.110   |
| <i>PaCO<sub>2</sub> (mmHg)</i>                |         |         |
| Time                                          | 3.79    | 0.001   |
| Group (Sigh vs. No Sigh)                      | 0.77    | 0.380   |
| Time* Group                                   | 0.18    | 0.983   |
| <i>Arterial pH</i>                            |         |         |
| Time                                          | 0.39    | 0.887   |
| Group (Sigh vs. No Sigh)                      | 1.71    | 0.192   |
| Time* Group                                   | 0.63    | 0.704   |
| <i>RR (bpm)</i>                               |         |         |
| Time                                          | 5.62    | <0.001  |
| Group (Sigh vs. No Sigh)                      | 7.93    | 0.005   |
| Time* Group                                   | 1.50    | 0.178   |
| <i>Corrected MVe (l/min)<sup>a</sup></i>      |         |         |
| Time                                          | 1.13    | 0.3428  |
| Group (Sigh vs. No Sigh)                      | 4.80    | 0.0294  |
| Time* Group                                   | 1.10    | 0.3614  |

| <i>VT (ml/Kg PBW)<sup>a</sup></i>      |       |        |
|----------------------------------------|-------|--------|
| Time                                   | 2.46  | 0.025  |
| Group (Sigh vs. No Sigh)               | 14.07 | <0.001 |
| Time* Group                            | 2.07  | 0.058  |
| <i>RASS<sup>b</sup></i>                |       |        |
| Time                                   | 4.31  | <0.001 |
| Group (Sigh vs. No Sigh)               | 1.36  | 0.245  |
| Time* Group                            | 0.70  | 0.652  |
| <i>SOFA<sup>b</sup></i>                |       |        |
| Time                                   | 14.98 | <0.001 |
| Group (Sigh vs. No Sigh)               | 3.34  | 0.0689 |
| Time* Group                            | 1.14  | 0.341  |
| <i>Sigh VT (ml/Kg PBW)<sup>a</sup></i> |       |        |
| Time                                   | 1.96  | 0.077  |

Generalized Estimating Equation (GEE) models for repeated measures.

<sup>a</sup>Observations are truncated at extubation.

<sup>b</sup>Model with outcome normalizing transformation.



**e-Table 4. Number of patients included in the analyses presented in e-Figures 1 and 2 for each parameter in each group. Note that patients number decreases over time due to death or successful extubation.**

| Days from randomization            |     |     |     |     |    |    |    |
|------------------------------------|-----|-----|-----|-----|----|----|----|
|                                    | 1   | 2   | 3   | 4   | 5  | 6  | 7  |
| PEEP (number of patients)          |     |     |     |     |    |    |    |
| Sigh                               | 126 | 101 | 81  | 69  | 60 | 57 | 46 |
| No Sigh                            | 122 | 109 | 90  | 81  | 68 | 52 | 43 |
| FiO <sub>2</sub>                   |     |     |     |     |    |    |    |
| Sigh                               | 128 | 126 | 107 | 93  | 88 | 72 | 64 |
| No Sigh                            | 128 | 123 | 114 | 104 | 94 | 82 | 70 |
| PaO <sub>2</sub> /FiO <sub>2</sub> |     |     |     |     |    |    |    |
| Sigh                               | 128 | 125 | 106 | 91  | 86 | 71 | 63 |
| No Sigh                            | 128 | 122 | 113 | 103 | 92 | 79 | 67 |
| PaCO <sub>2</sub>                  |     |     |     |     |    |    |    |
| Sigh                               | 128 | 125 | 112 | 93  | 87 | 71 | 64 |
| No Sigh                            | 128 | 123 | 115 | 105 | 95 | 79 | 69 |
| pH                                 |     |     |     |     |    |    |    |
| Sigh                               | 128 | 125 | 112 | 93  | 87 | 71 | 64 |
| No Sigh                            | 128 | 123 | 115 | 105 | 95 | 79 | 69 |
| RR                                 |     |     |     |     |    |    |    |
| Sigh                               | 128 | 123 | 106 | 92  | 86 | 72 | 64 |
| No Sigh                            | 128 | 121 | 113 | 103 | 95 | 82 | 70 |
| VT                                 |     |     |     |     |    |    |    |
| Sigh                               | 123 | 95  | 70  | 63  | 51 | 52 | 42 |
| No Sigh                            | 122 | 109 | 90  | 80  | 68 | 52 | 43 |
| Corrected MVe                      |     |     |     |     |    |    |    |
| Sigh                               | 125 | 100 | 80  | 68  | 59 | 55 | 45 |
| No Sigh                            | 122 | 108 | 89  | 81  | 68 | 52 | 43 |
| RASS                               |     |     |     |     |    |    |    |
| Sigh                               | 128 | 126 | 113 | 96  | 89 | 73 | 64 |
| No Sigh                            | 128 | 124 | 116 | 106 | 97 | 82 | 72 |
| SOFA                               |     |     |     |     |    |    |    |
| Sigh                               | 128 | 126 | 113 | 95  | 89 | 73 | 64 |
| No Sigh                            | 128 | 123 | 116 | 105 | 96 | 82 | 72 |
| Sigh VT                            |     |     |     |     |    |    |    |
| Sigh                               | 123 | 95  | 71  | 64  | 52 | 52 | 42 |

**e-Figure 1 – Physiological parameters in the 2 study arms over the first 7 days from randomization (for statistical analysis)**

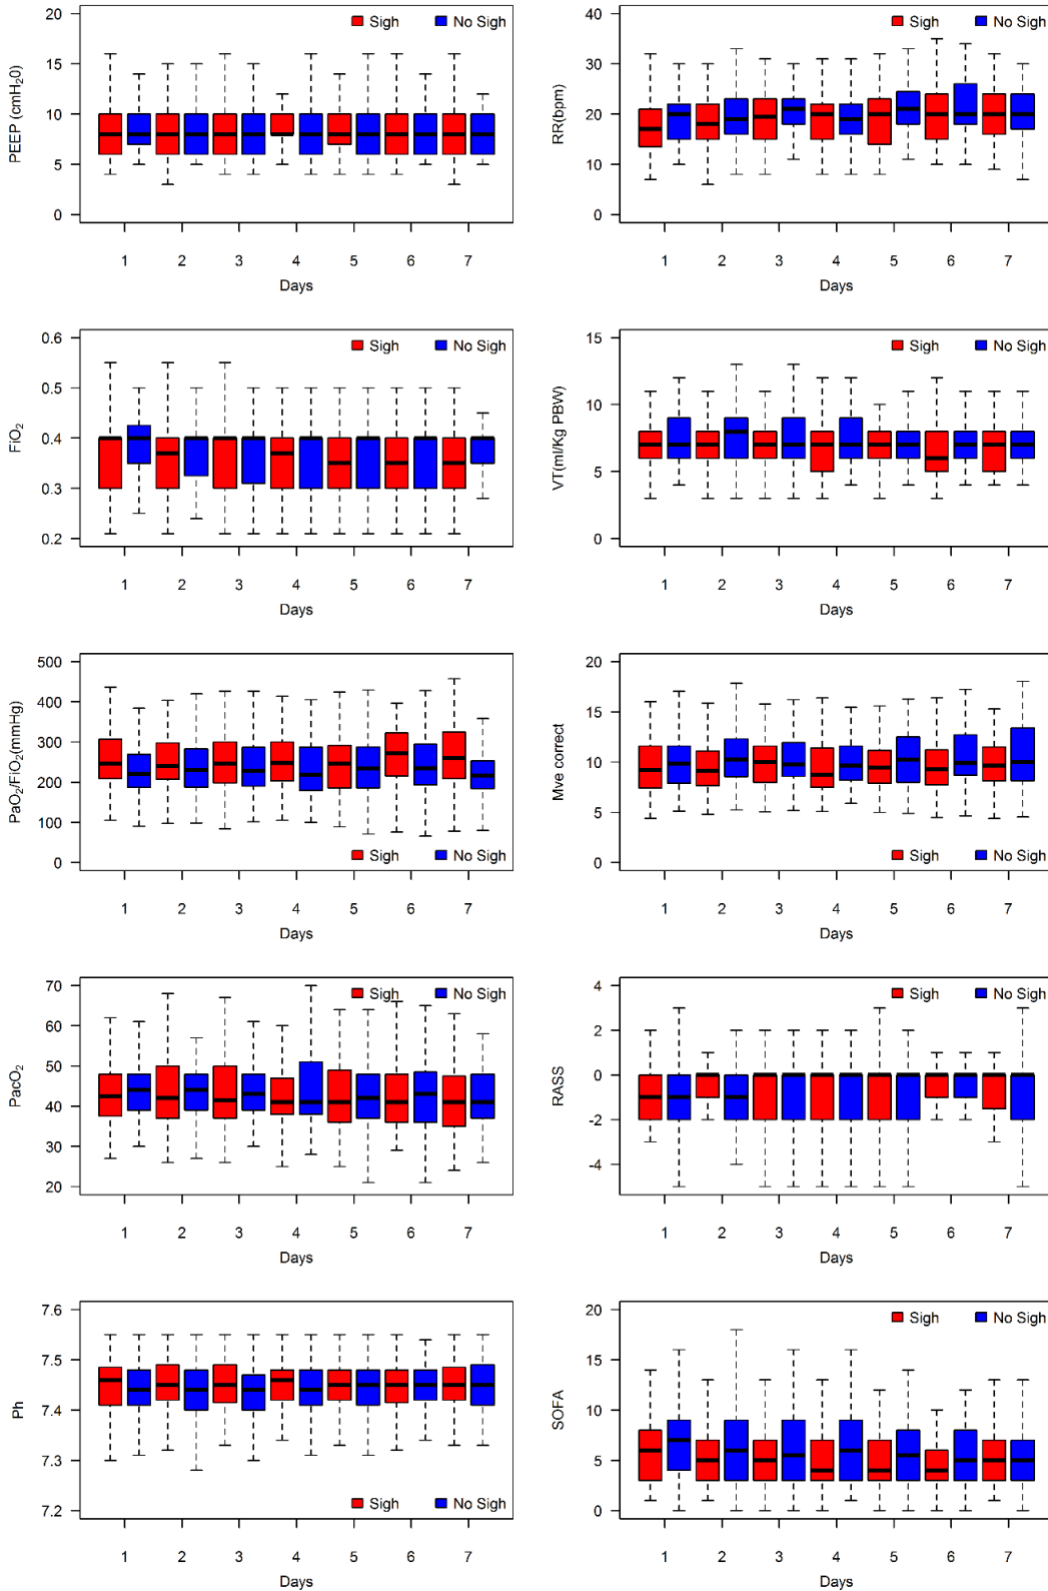

**e-Figure 2. Tidal volume delivered by Sigh in the first 7 days from randomization**

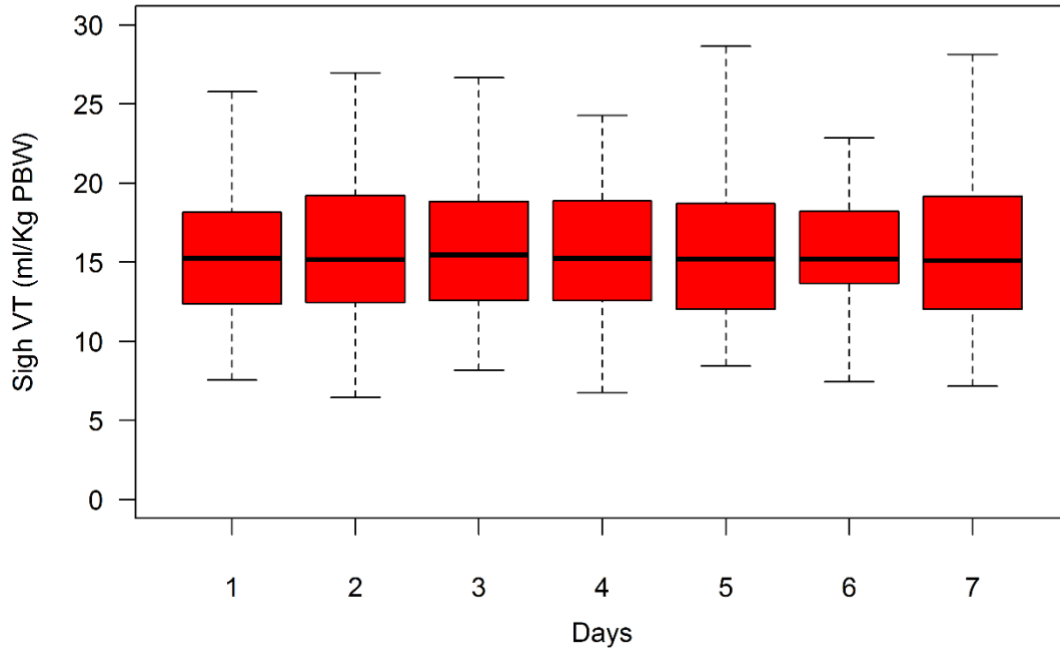

Supplement: mmc1.pdf [file mmc1.pdf]
